# Supplementary material for: Peach extract induces systemic and local immune responses in an experimental food allergy model
Source: PubMed Central journal article supplement (PMC9894845; doi:10.1038/s41598-023-28933-1), 2023-02-02
Supplement: 41598_2023_28933_MOESM1_ESM.pdf [file 41598_2023_28933_MOESM1_ESM.pdf]

# Supplemental Material

## **Peach extract induces systemic and local immune responses in an experimental food allergy model**

*H. Steigerwald<sup>1</sup>, M. Krause<sup>1</sup>, I. Gonzalez-Menendez<sup>2,3</sup>, L. Quintanilla-Martinez<sup>2,3</sup>, S. Vieths<sup>1</sup>, S. Scheurer<sup>1</sup>, M. Albrecht<sup>1†</sup>, F. Blanco-Pérez<sup>1†\*</sup>*

<sup>1</sup>Vice President Research Group “Molecular Allergology”, Paul-Ehrlich-Institut (PEI), Federal Institute for Vaccines and Biomedicines, Langen, Germany

<sup>2</sup>Institute of Pathology and Neuropathology, Comprehensive Cancer Center, University Hospital Tübingen, Eberhard Karls University of Tübingen, Tübingen, Germany

<sup>3</sup>Cluster of Excellence iFIT (EXC 2180) “Image-Guided and Functionally Instructed Tumor Therapies”, Eberhard Karls University of Tübingen, Tübingen, Germany

| <b>Symptom Score</b> | <b>0</b>                      | <b>1</b>                              | <b>2</b>                      |
|----------------------|-------------------------------|---------------------------------------|-------------------------------|
| <b>Behaviour</b>     | normal                        | calm                                  | apathetic                     |
| <b>Fur</b>           | normal                        | slightly ruffled                      | ruffled                       |
| <b>Stool</b>         | normal                        | Soft                                  | with mucus                    |
| <b>Body temp.</b>    | $\Delta < -1^{\circ}\text{C}$ | $\Delta < -1$ to $-2^{\circ}\text{C}$ | $\Delta > -2^{\circ}\text{C}$ |

**Table S1: Score sheet**

Score sheet parameters for quantification of clinical signs after oral exposition and provocation. Four different clinical signs were evaluated and scored from 0 to 2, with a maximum score of 8.

| <b>Target</b> | <b>Label</b> | <b>Clone</b> | <b>Company</b> |
|---------------|--------------|--------------|----------------|
| CD45          | FITC         | 30-F11       | BioLegend      |
| CD11c         | BV605        | N418         | BioLegend      |
| CD11b         | BV421        | M1/70        | BioLegend      |
| MHCII         | BV510        | M5/114.15.2  | BioLegend      |
| CD64          | PECy7        | X54-5/7.1    | BioLegend      |
| CD117         | BV711        | 2B8          | BioLegend      |
| Ly6G          | Alexa647     | 1A8          | BioLegend      |
| SiglecF       | PE           | S17007L      | BioLegend      |
| CD3           | BV421        | 17A2         | BioLegend      |
| CD4           | PECy7        | GK1.5        | BioLegend      |
| CD8a          | BF510        | 53-6.7       | BioLegend      |
| CD19          | PE-BV605     | 6D5          | BioLegend      |
| CD25          | BV711        | PC61         | BioLegend      |
| FoxP3         | PE           | 150D         | BioLegend      |

**Table S2: Antibodies used for flow cytometry**

Used antibodies and specifications for flow cytometry.

## T- and B-cell Panel:

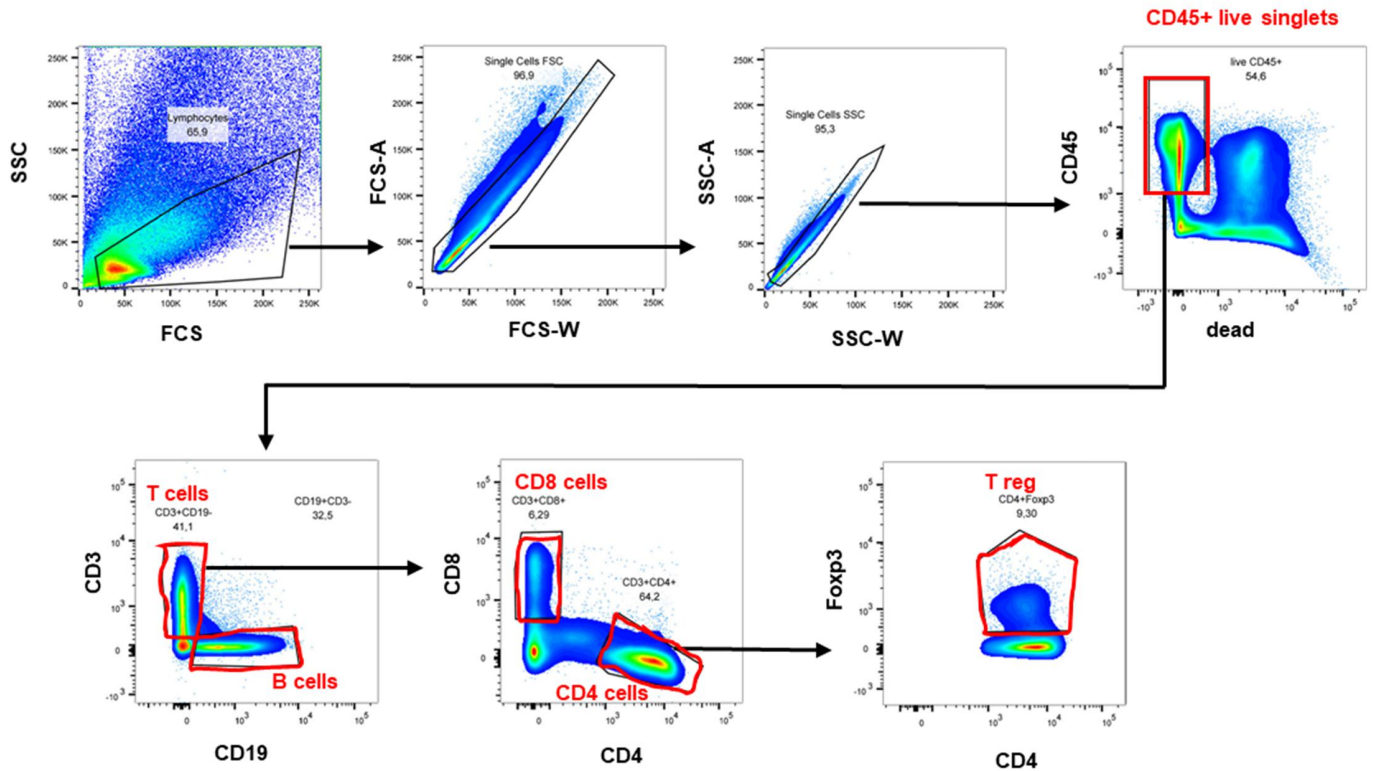

**Figure S1: Gating strategy for T and B cells panel**

Live lymphocytes among lamina propria cells were gated for FSC, SSC characteristics, cleaned up from doublets in FCS and SSC channel and identified as CD45+ live population (CD45+ live singlets). Among these, B cells were CD19+CD3- and T cells CD19-CD3+ populations. T cells were further discriminated for CD8 or CD4 expression. T regs were identified as Foxp3+ population among CD4 cells.

## Granulocyte Panel:

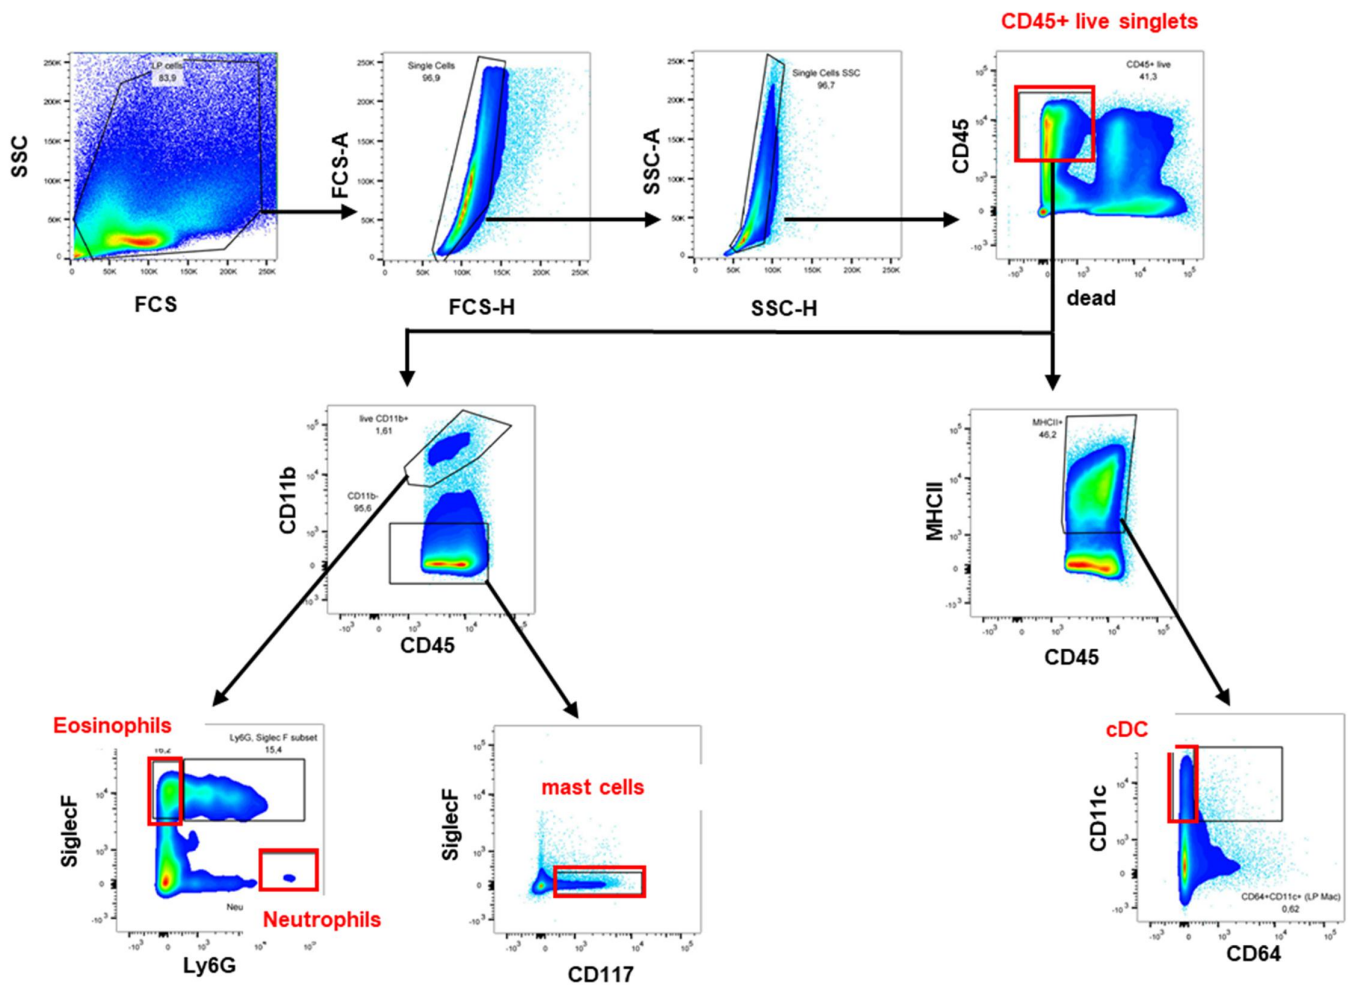

**Figure S2: Gating strategy for granulocyte panel**

Live lamina propria cells were gated for FSC, SSC characteristics, cleaned up from doublets in FCS and SSC channel and identified as CD45+ live population (CD45+ live singlets). Within this population CD11b+ and CD11b- populations were identified. Among CD11b+ population Eosinophils were SiglecF+Ly6G- and Neutrophils SiglecF- Ly6G+. Mast cells were identified as CD117+SiglecF- among CD11b- population. In addition, MHCII+ cells were identified among CD45+live singlets and subsequently analyzed for CD11c+CD64- conventional dendritic cells (cDC).

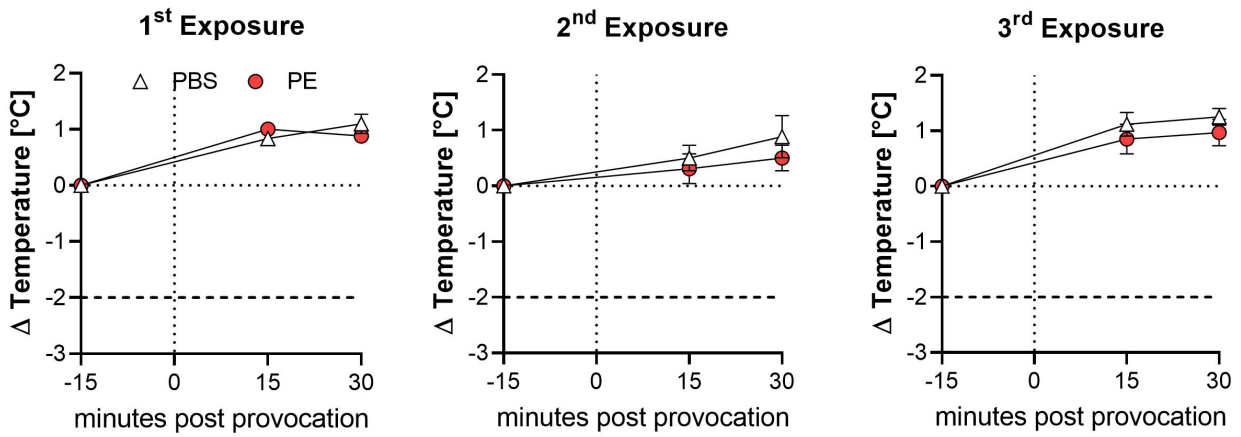

**Figure S3: Core body temperature after oral exposure**

Body temperature of mice after 1st, 2nd and 3rd oral exposure. n = 6-10, data presented as combination of 2 experiments performed under identical settings.

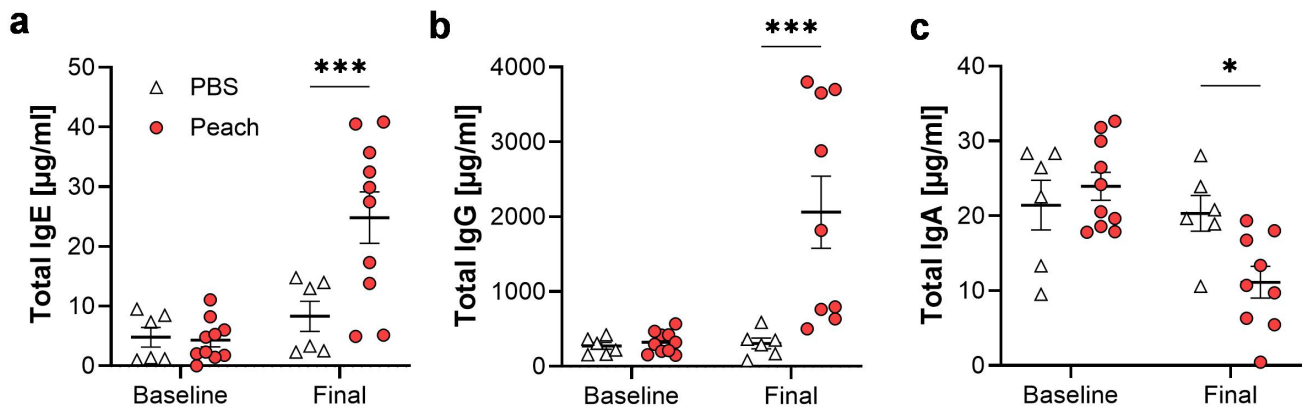

**Figure S4: Total immunoglobulin levels in serum**

Levels of (a) total IgE, (b) total IgG and (c) total IgA were analyzed in the serum of the mice before (baseline) or after (final) sensitization and provocation via ELISA. n = 6-10, data presented as combination of 2 experiments performed under identical settings; \*p < 0.05; \*\*\*p < 0.001

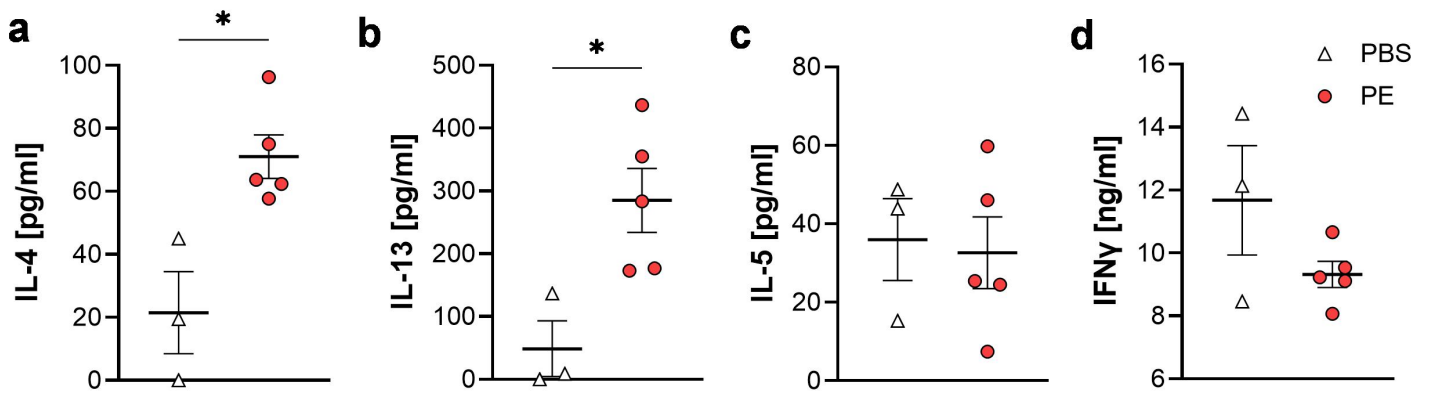

**Figure S5: Measurement of cytokine secretion**

Data show levels of (a) IL-4, (b) IL-13, (c) IL-5 and (d) IFN $\gamma$  measured by ELISA in the supernatant of stimulated splenocytes from PBS- or PE-treated mice. n = 3-5; \*p < 0.05



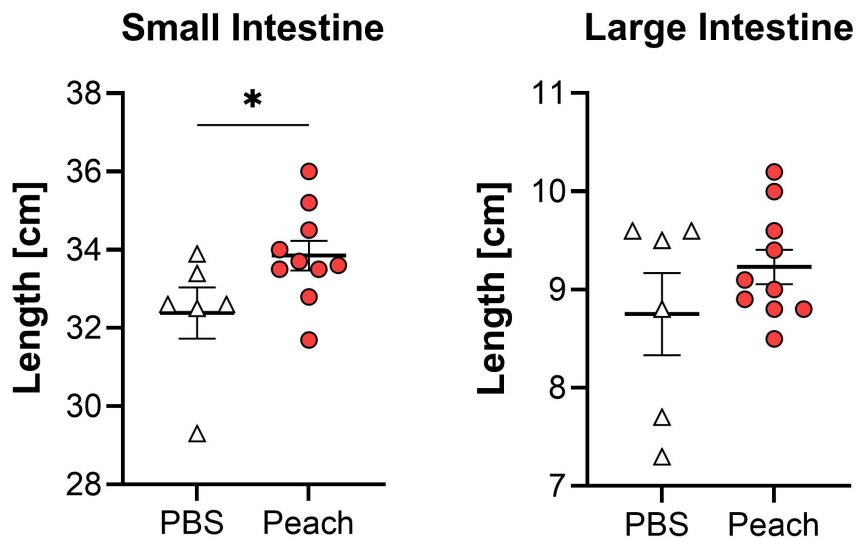

**Figure S6: Measurement of intestine length**

Length of small intestine and large intestine were measured after provocation and euthanasia of the mice. n = 6-10, data presented as combination of 2 experiments performed under identical settings. n = 6-10; \*p < 0.05

**a Sensitization with nPru p 3**

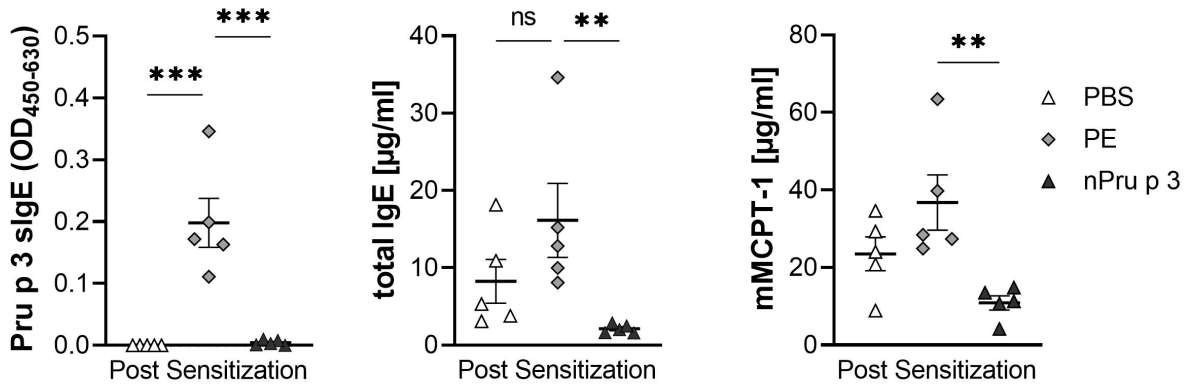

**b Sensitization with PE; provocation with nPru p 3 or PE**

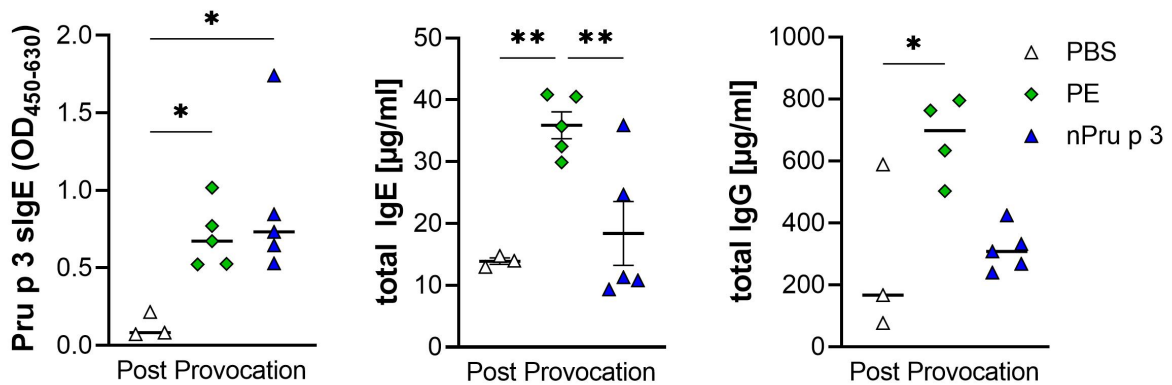

**Figure S7: Antibody levels after sensitization or provocation with nPru p 3 compared to PE**

(a) Mice were sensitized with 20  $\mu$ g nPru p 3, 200  $\mu$ g PE or PBS by i.p.-injection. Pru p 3-specific IgE (sIgE), total IgE and mMCP-1 levels were determined in the serum of the mice post sensitization. (b) Mice were sensitized with 200  $\mu$ g PE or PBS and challenged with either PBS, PE or nPru p 3. Pru p 3-sIgE, total IgE and total IgG were determined in the serum post challenge. n = 3-5; \*p < 0.05; \*\*p < 0.01.

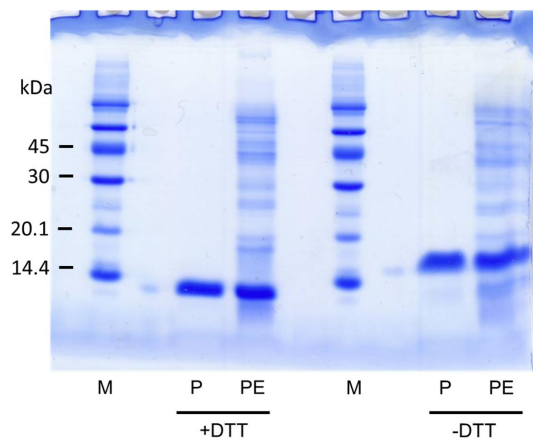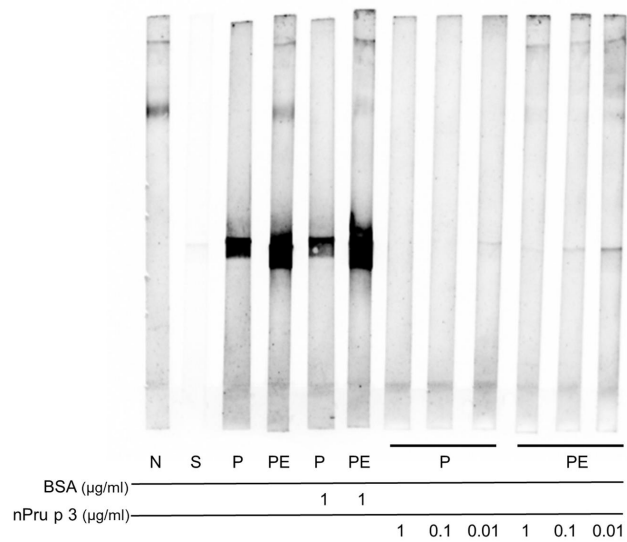

Uncut Figure 1 in compliance with Nature digital image and integrity policies.

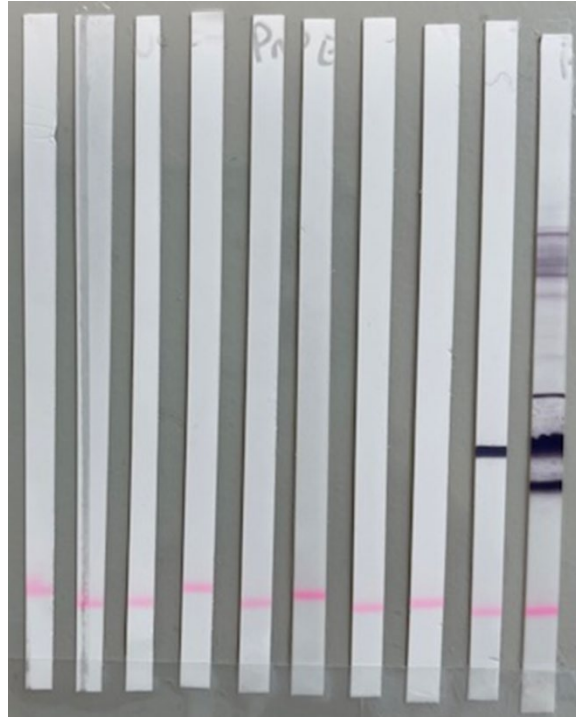

**Uncut Figure 4 in compliance with Nature digital image and integrity policies.**
